# Supplementary material for: Tuning the Electronic Structure of a Novel 3D Architectured Co-N-C Aerogel to Enhance Oxygen Evolution Reaction Activity
Source: MDPI journal article supplement (doi:10.3390/gels9040313), 2023-04-07
Supplement: s1 [file s1]

## Supplementary Information

# Tuning the Electronic Structure of a Novel 3D Architected Co-N-C Aerogel to Enhance Oxygen Evolution Reaction Activity

Chunsheng Ni <sup>1</sup>, Shuntian Huang <sup>1</sup>, Tete Daniel Koudama <sup>1</sup>,  
Xiaodong Wu <sup>1,\*</sup>, Sheng Cui <sup>1,\*</sup>, Xiaodong Shen <sup>1</sup> and Xiangbao Chen <sup>2</sup>

<sup>1</sup> College of Materials Science and Engineering, Nanjing Tech University, Nanjing 210009, China

<sup>2</sup> AECC Beijing Institute of Aeronautical Materials, Beijing 100095, China

\* Correspondence: wuxiaodong@njtech.edu.cn (X.W.); scui@njtech.edu.cn (S.C.)

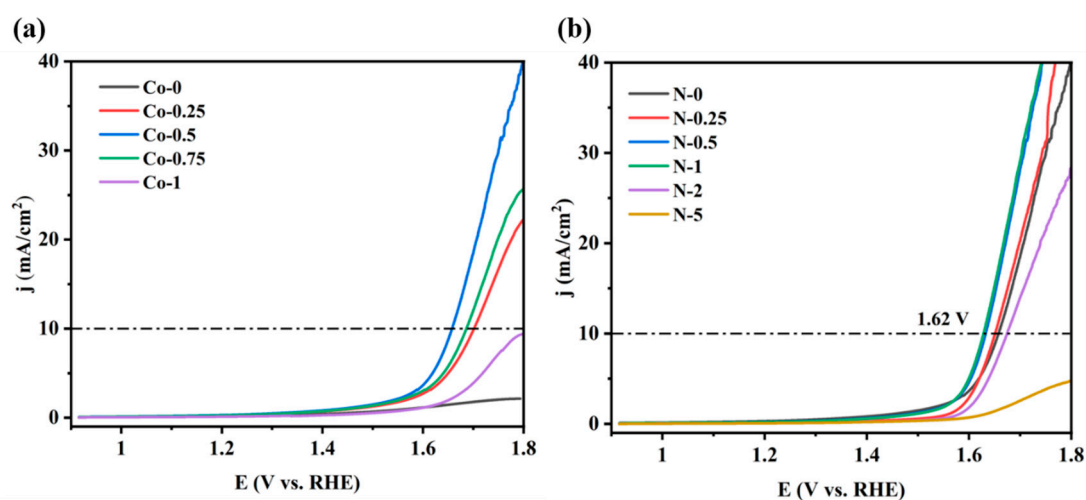

**Figure S1.** (a) LSV curves of Co-C with different cobalt doping amounts (wt%); (b) LSV curves of Co-N-C with different nitrogen doping amounts (wt%).

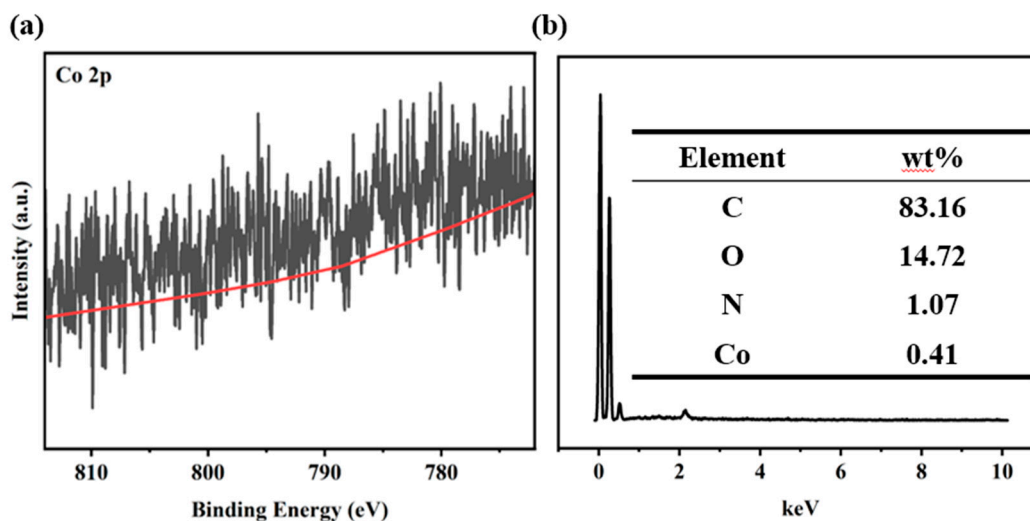

**Figure S2.** (a) Co 2p high-resolution XPS spectrum and (b) EDS of Co-N-C.

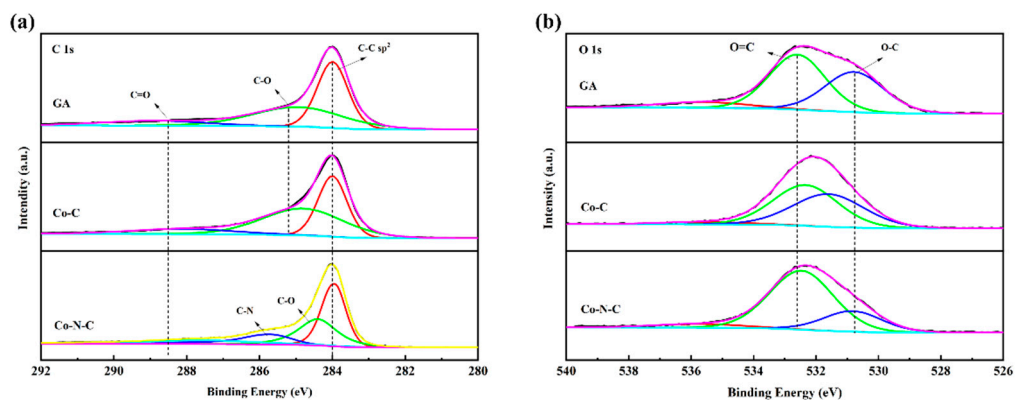

**Figure S3.** C 1s (a) and O 1s (b) high-resolution XPS spectrum of GA, Co-C, and Co-N-C.

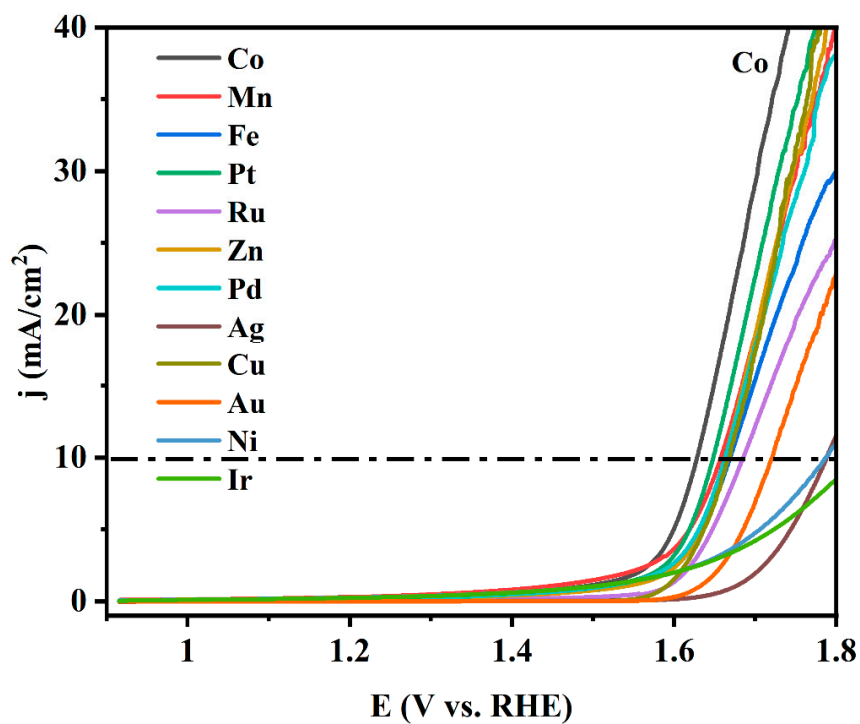

**Figure S4.** LSV curves of M-N-C aerogel electrocatalysts (M=Mn, Fe, Ni, Pt, Au, etc.).

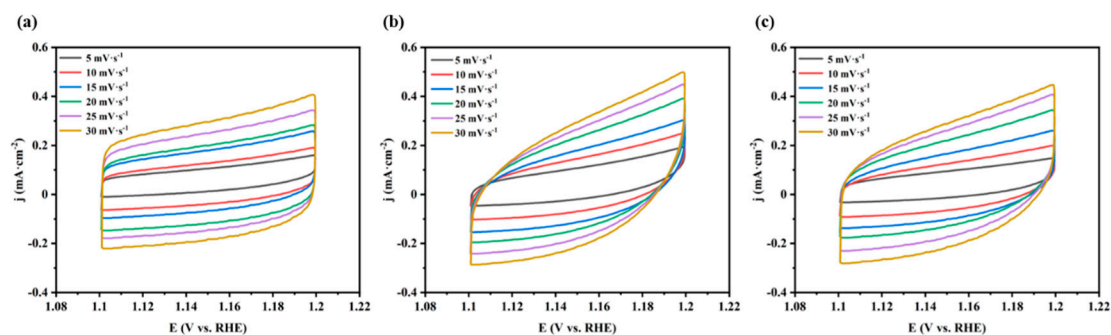

**Figure S5.** Typical CV curves of (a) GA, (b) Co-C, and (c) Co-N-C at different scan rates.

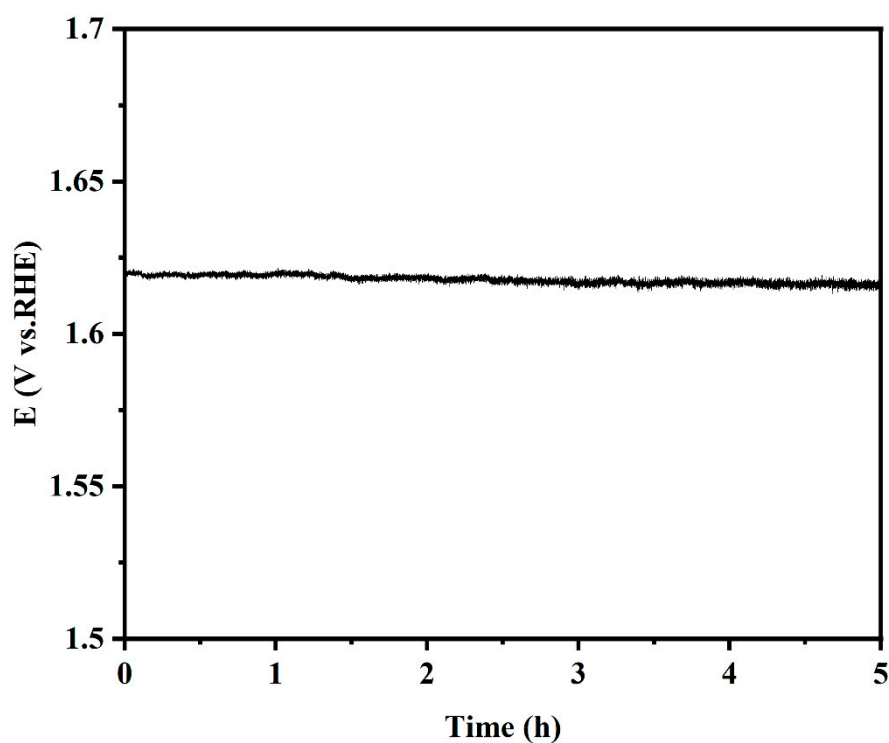

**Figure S6.** Chronopotentiometric curve for the Co-N-C at 10 mA/cm<sup>2</sup>.

**Table S1.** Comparison of Co-N-C aerogel and some previously reported Co-N-C electrocatalysts in terms of OER performance.

| electrocatalyst                            | Overpotential at 10mA/cm <sup>2</sup> | Reference |
|--------------------------------------------|---------------------------------------|-----------|
| Co-N-C aerogel                             | 0.383 V                               | This work |
| Mo <sub>2</sub> C-Co-N-C                   | 0.396 V                               | [1]       |
| Co@CoO@Co <sub>3</sub> O <sub>4</sub> -N/C | 0.45 V                                | [2]       |
| Co/Co-N-C                                  | 0.41 V                                | [3]       |
| 3D Co-N-C NN-800                           | 0.47 V                                | [4]       |

|                          |         |      |
|--------------------------|---------|------|
| CoO <sub>x</sub> /Co-N-C | 0.42 V  | [5]  |
| 3D-Co-N-C-annealing      | 0.42 V  | [6]  |
| 3DOM Co-NCPs-900         | 0.418 V | [7]  |
| Mn/Co-N-C-0.02-800       | 0.43 V  | [8]  |
| CoO/Co@N-C               | 0.442 V | [9]  |
| Co-N-C-0.4               | 0.39 V  | [10] |
| Fe,Co,N-C                | 0.41 V  | [11] |
| Co/N-Pg                  | 0.40 V  | [12] |
| CoA@CNC-700              | 0.46 V  | [13] |
| Co-NCNT                  | 0.40 V  | [14] |

## References

- Sam, D.K.; Gong, S.H.; Durairaj, A.; Sam, E.K.; Liu, J.; Lv, X.M. Fabrication of highly dispersed Mo<sub>2</sub>C coupled with Co-N-C via self-template as bifunctional electrocatalysts. *Int. J. Energy Res.* **2021**, *45*, 10989-11001.
- Xu, G.; Xu, G.C.; Ban, J.J.; Zhang, L.; Lin, H.; Qi, C.L.; Sun, Z.P.; Jia, D.Z. Cobalt and cobalt oxides N-codoped porous carbon derived from metal-organic framework as bifunctional catalyst for oxygen reduction and oxygen evolution reactions. *J. Colloid Interf Sci.* **2018**, *521*, 141-149.
- Wang, D.; Yang, P.X.; Xu, H.; Ma, J.Y.; Du, L.; Zhang, G.X.; Li, R.P.; Jiang, Z.; Li, Y.; Zhang, J.Q.; An, M.Z. The dual-nitrogen-source strategy to modulate a bifunctional hybrid Co/Co-N-C catalyst in the reversible air cathode for Zn-air batteries. *J. Power Sources* **2021**, *485*, 229339.
- Wang, R.; Cao, J.Y.; Cai, S.C.; Yan, X.M.; Li, J.S.; Yourey, W.M.; Tong, W.; Tang, H.L. MOF@Cellulose Derived Co-N-C Nanowire Network as an Advanced Reversible Oxygen Electrocatalyst for Rechargeable Zinc-Air Batteries. *Acs Appl. Energ. Mater.* **2018**, *1*, 1060-1068.
- Xin, W.L.; Lu, K.K.; Zhu, D.R.; Zeng, H.B.; Zhang, X.J.; Marks, R.S.; Shan, D. Highly reactive N,N'-carbonyldiimidazole-tailored bifunctional electrocatalyst for oxygen reduction and oxygen evolution. *Electrochim. Acta* **2019**, *307*, 375-384.
- Xiang, F.; Yang, J.; Gong, W.X.; Zou, J.; Liu, Y.Z.; Li, Y.L.; Guo, H.; Wang, L.P.; Niu, X.B. Facile Synthesis of Graphene-like Porous Carbon with Densely Populated Co-N-x Sites as Efficient Bifunctional Electrocatalysts for Rechargeable Zinc-Air Batteries. *Acs Appl. Energ. Mater.* **2021**, *4*, 11545-11554.
- Hao, Y.X.; Kang, Y.M.; Mi, Y.J.; Wang, W.; Lei, Z.Q. Highly ordered micro-meso-macroporous Co-N-doped carbon polyhedrons from bimetal-organic frameworks for rechargeable Zn-air batteries. *J. Colloid Interf Sci.* **2021**, *598*, 83-92.
- Wei, L.C.; Qiu, L.J.; Liu, Y.Y.; Zhang, J.M.; Yuan, D.S.; Wang, L. Mn-Doped Co-N-C Dodecahedron as a Bifunctional Electrocatalyst for Highly Efficient Zn-Air Batteries. *ACS Sustain. Chem. Eng.* **2019**, *7*, 14180-14188.
- Ding, Y.J.; Yang, W.Y.; Gao, S.; Sun, W.Z.; Sun, C.X.; Li, Q. Strongly Cooperative Nano-CoO/Co Active Phase in Hierarchically Porous Nitrogen-Doped Carbon Microspheres for Efficient Bifunctional Oxygen Electrocatalysis. *Acs Appl. Energ. Mater.* **2020**, *3*, 1328-1337.
- Hu, E.L.; Ning, J.Q.; He, B.; Li, Z.P.; Zheng, C.C.; Zhong, Y.J.; Zhang, Z.Y.; Hu, Y. Unusual formation of tetragonal microstructures from nitrogen-doped carbon nanocapsules with cobalt nanocores as a bi-functional oxygen electrocatalyst. *J. Mater. Chem. A.* **2017**, *5*, 2271-2279.
- Sarkar, S.; Biswas, A.; Siddharthan, E.E.; Thapa, R.; Dey, R.S. Strategic Modulation of Target-Specific Isolated Fe,Co Single-Atom Active Sites for Oxygen Electrocatalysis Impacting High Power Zn-Air Battery. *Acs Nano* **2022**, *16*, 7890-7903.

12. Tian, Y.H.; Xu, L.; Bao, J.; Qian, J.C.; Su, H.N.; Li, H.M.; Gu, H.D.; Yan, C.; Li, H.N. Hollow cobalt oxide nanoparticles embedded in nitrogen-doped carbon nanosheets as an efficient bifunctional catalyst for Zn-air battery. *J. Energy Chem.* **2019**, *33*, 59-66.
13. Shen, M.X.; Gao, K.; Xiang, F.K.; Wang, B.B.; Dai, L.; Zheng, L.Q.; Baker, F.; Duan, C.; Zhang, Y.H.; Sun, S.H.; Ni, Y.H. Nanocellulose-assisted synthesis of ultrafine Co nanoparticles-loaded bimodal micro-mesoporous N-rich carbon as bifunctional oxygen electrode for Zn-air batteries. *J. Power Sources* **2022**, *450*, 227640.
14. Pei, Z.X.; Huang, Y.; Tang, Z.J.; Ma, L.T.; Liu, Z.X.; Xue, Q.; Wang, Z.F.; Li, H.F.; Chen, Y.; Zhi, C.Y. Enabling highly efficient, flexible and rechargeable quasi-solid-state zn-air batteries via catalyst engineering and electrolyte functionalization. *Energy Storage Mater.* **2019**, *20*, 234-242.
